# Supplementary material for: Bact-to-Batch: A Microbiota-Based Tool to Determine Optimal Animal Allocation in Experimental Designs
Source: MDPI journal article supplement (doi:10.3390/ijms24097912), 2023-04-26
Supplement: s1 [file s1]

### sequence counts summary

|          |                |
|----------|----------------|
| Minimum: | 48639          |
| Median:  | 98827.5        |
| Mean:    | 98799.5        |
| Maximum: | 215012         |
| Total:   | <u>1975987</u> |

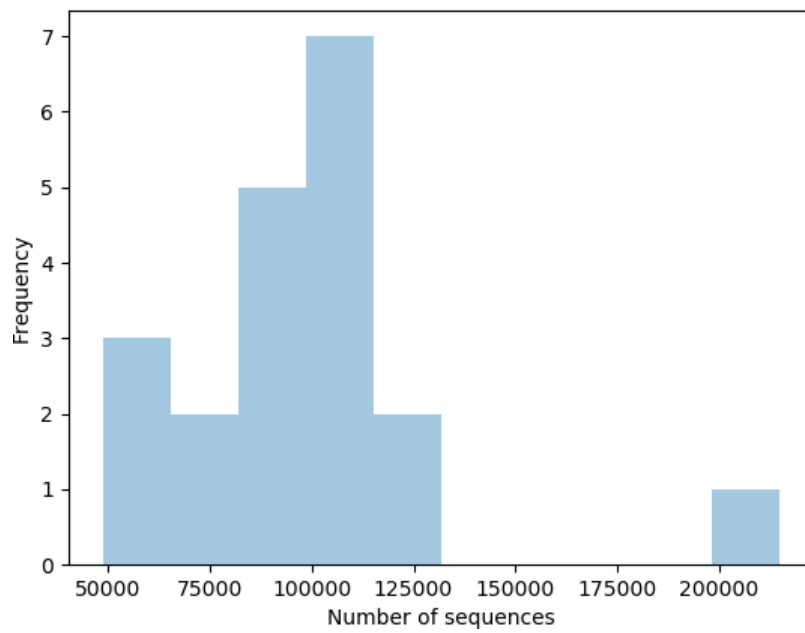

**Supplementary Figure S1 | Sequencing data sets generated in this study.**

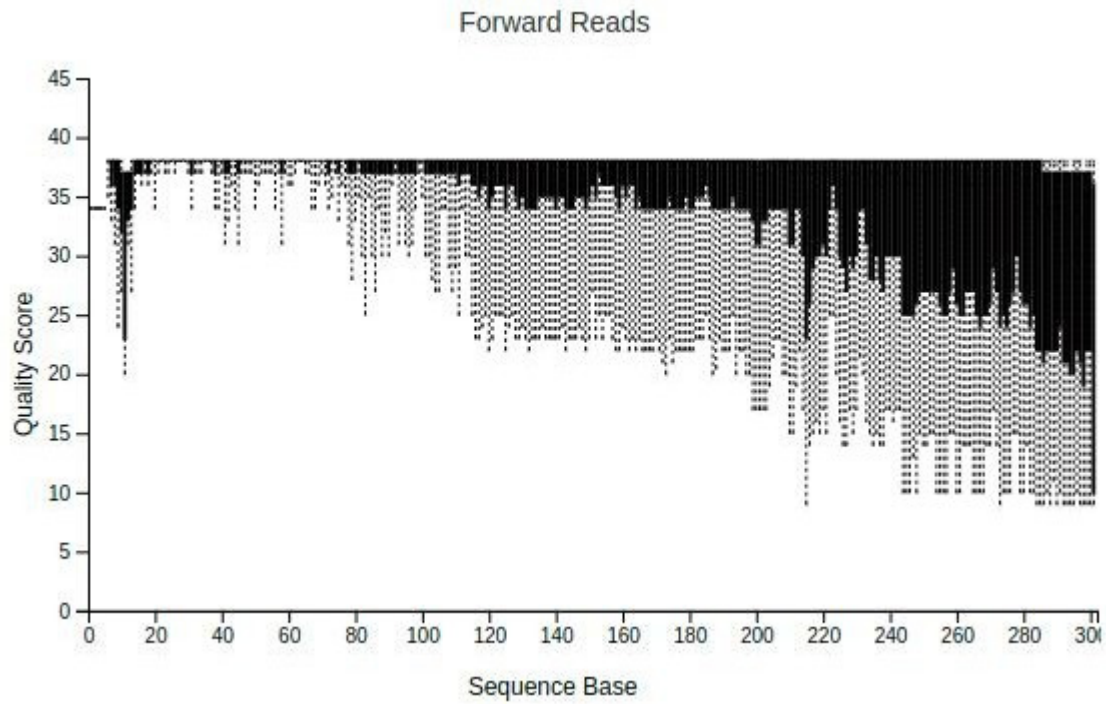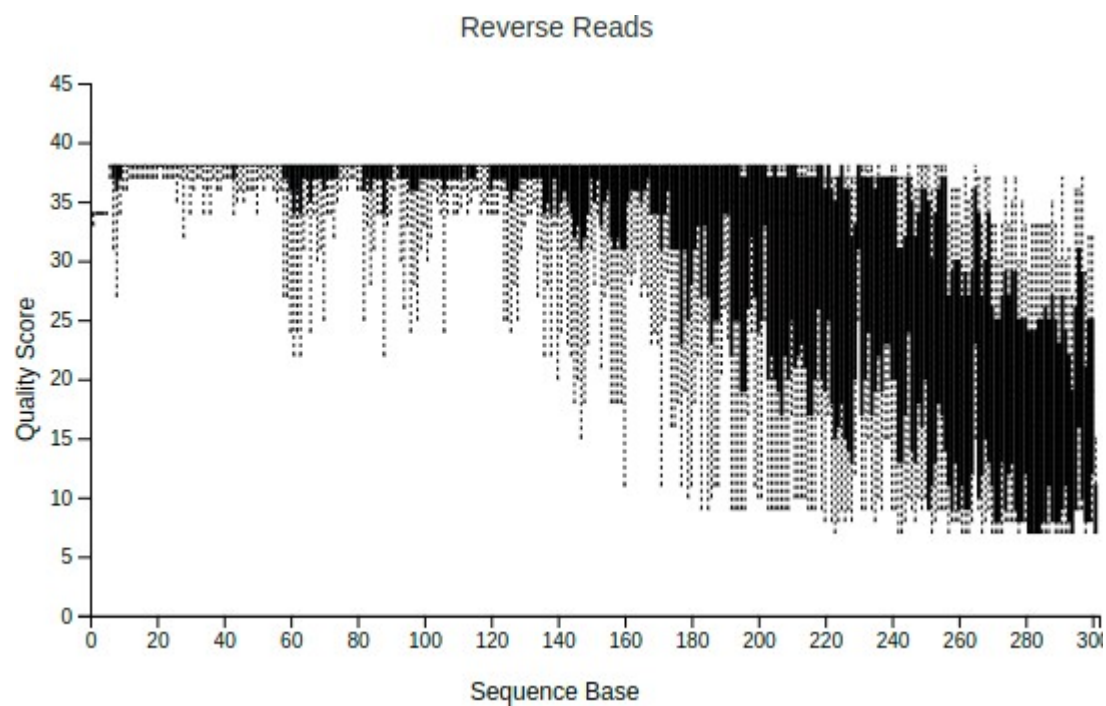

Supplementary Figure S2 | Quality plots for forward and reverse reads.

| SAMPLES NUMBER | NUMBER OF ASVs | MEAN READS BEFORE DADA2 | MEAN READS AFTER DADA2 | FINAL PERCENTAGE OF RETAINED READS |
|----------------|----------------|-------------------------|------------------------|------------------------------------|
| 20             | 947            | 94103.7                 | 44753.7                | 47.1                               |

**Supplementary TableS1 | Summary metrics after DADA2 Denoise and dereplicate paired-end sequences.**

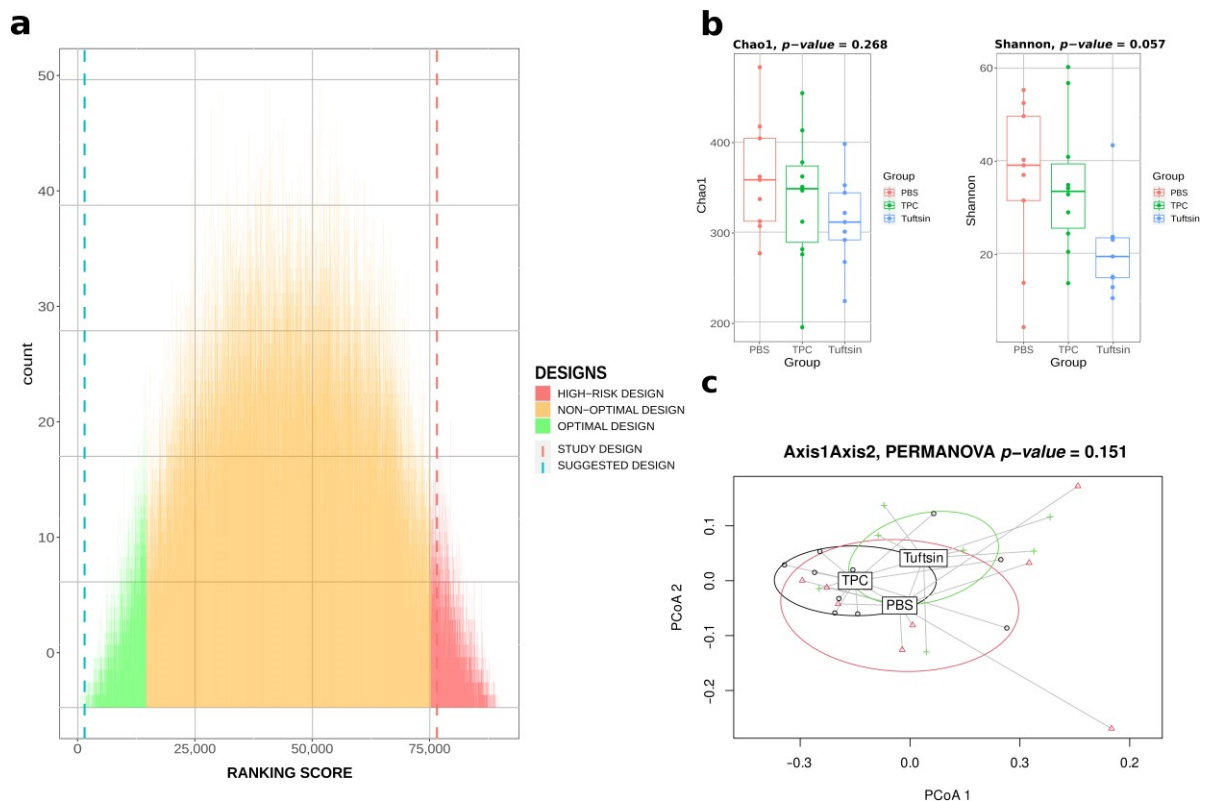

**Supplementary Figure S3 | Analysis of the mice allocation design selected by the third party study.** **a**, Bar chart displaying the ranking score metrics of 90,000 randomly simulated experimental mice allocation designs (integrating the design chosen during the study of Neuman *et al.*) obtained by **Bact-to-Batch** algorithm. The suggested best design of mice allocation in 3 groups proposed by **Bact-to-Batch** is represented by the blue dotted line and the selected design from the Neuman *et al.* study by the red dotted line. **b**, Microbiota  $\alpha$ -diversity boxplots (Chao1 and Shannon indices) of the three groups of mice according to the Neuman *et al.* study. **c**, PCoA displaying the microbiota  $\beta$ -diversity of the three groups of mice belonging to the Neuman *et al.* study design.
